# Supplementary material for: Going above and beyond for implementation: the development and validity testing of the Implementation Citizenship Behavior Scale (ICBS)
Source: Implement Sci. 2015 May 7;10:65. doi: 10.1186/s13012-015-0255-8 (PMC4465615; doi:10.1186/s13012-015-0255-8)
Supplement: Additional file 1: — Implementation Citizenship Behavior Scale (ICBS). This file contains the ICBS measure assessing the behaviors employees perform that exceed their expected job tasks to support the implementation of evidence-based practices (EBPs). [file 13012_2015_255_MOESM1_ESM.pdf]

## Implementation Citizenship Behavior Scale (ICBS)

Mark G. Ehrhart  
mehrhart@mail.sdsu.edu

Gregory A. Aarons  
gaarons@ucsd.edu

This measure assesses the behaviors employees perform that exceed their expected job tasks to support the implementation of evidence-based practices (EBPs).

Instructions: Please indicate the frequency with which [INSERT SUBORDINATE NAME] performs each of the following behaviors.

| 0          | 1               | 2         | 3            | 4                         |
|------------|-----------------|-----------|--------------|---------------------------|
| Not at all | Once in a While | Sometimes | Fairly Often | Frequently, if not Always |

### Helping Others

1. Assisting others to make sure they implement evidence-based practices properly ..... 0 1 2 3 4
2. Helping teach evidence-based practice implementation procedures to new team members ..... 0 1 2 3 4
3. Helping others with responsibilities related to the implementation of evidence-based practices ..... 0 1 2 3 4

### Keeping Informed

4. Keeping informed of changes in evidence-based practice policies and procedures .... 0 1 2 3 4
5. Keeping up with the latest news regarding evidence-based practices ..... 0 1 2 3 4
6. Keeping up with agency communication (announcements, memos, and so on) related to evidence-based practice ..... 0 1 2 3 4
