# Supplementary material for: Going above and beyond for implementation: the development and validity testing of the Implementation Citizenship Behavior Scale (ICBS)
Source: Implement Sci. 2015 May 7;10:65. doi: 10.1186/s13012-015-0255-8 (PMC4465615; doi:10.1186/s13012-015-0255-8)
Supplement: Additional file 2: — Implementation Citizenship Behavior Scale (ICBS) Scoring Instructions. This file contains scoring instructions for the ICBS measure. [file 13012_2015_255_MOESM2_ESM.pdf]

## Implementation Citizenship Behavior Scale (ICBS) Scoring Instructions

Mark G. Ehrhart  
mehrhart@mail.sdsu.edu

Gregory A. Aarons  
gaarons@ucsd.edu

This measure assesses the behaviors employees perform that exceed their expected job tasks to support the implementation of evidence-based practices (EBPs).

### Abbreviated Items and Scoring

| Item #                           | Scale                                               | Factor Loading | Alpha |
|----------------------------------|-----------------------------------------------------|----------------|-------|
| <b>Scale 1: Helping Others</b>   |                                                     |                | .93   |
| 1                                | Assisting others to make sure they implement EBP    | .92            |       |
| 2                                | Helping teach EBP implementation procedures         | .87            |       |
| 3                                | Helping others with responsibilities related to EBP | .86            |       |
| <b>Scale 2: Keeping Informed</b> |                                                     |                | .91   |
| 4                                | Keeping informed of changes in EBP policies         | .92            |       |
| 5                                | Keeping up with the latest news regarding EBP       | .88            |       |
| 6                                | Keeping up with agency communication related to EBP | .79            |       |
| <b>ICBS Total</b>                |                                                     |                | .93   |

### SCORING THE SCALES

The score for each subscale is created by computing a mean score for each set of items that load on a given subscale. For example, items 1, 2, and 3 constitute Scale 1 (Helping Others).

### COMPUTING THE TOTAL SCORE

A mean of the scale scores may be computed to yield the mean score for the total ICBS.

You may contact Dr. Aarons (gaarons@ucsd.edu) for additional information or to request permission to use the measure.
